# Supplementary material
Source: publisher site journal article supplement (https://www.dovepress.com/article/292302)
Supplement: Supplementary file 1 [file get_supplementary_file.php]

Table 1: The difference in ReHo value in brain regions between SLE and HC

| Brain regions                | Cluster size<br>( Number of voxels ) | Peak MNI coordinates |     |    | Peak<br>intensity |
|------------------------------|--------------------------------------|----------------------|-----|----|-------------------|
|                              |                                      | X                    | Y   | Z  |                   |
| Typical band (0.01–0.08Hz)   |                                      |                      |     |    |                   |
| Left CAL                     | 383                                  | -15                  | -60 | 6  | -4.59             |
| Right CAL                    | 194                                  | 24                   | -54 | 6  | -4.71             |
| Left MFG                     | 140                                  | -24                  | 54  | 27 | 4.60              |
| Right MFG                    | 421                                  | 36                   | 48  | 27 | 4.73              |
| Slow-4 (0.027-0.073Hz)       |                                      |                      |     |    |                   |
| Left CAL                     | 360                                  | -15                  | -60 | 6  | -4.47             |
| Right CAL                    | 236                                  | 24                   | -54 | 3  | -4.37             |
| Right MFG                    | 567                                  | 36                   | 42  | 33 | 5.13              |
| Slow-5 (0.01–0.027Hz)        |                                      |                      |     |    |                   |
| No significant brain regions |                                      |                      |     |    |                   |

MNI, Montreal Neurological Institute; CAL: calcarine fissure and surrounding cortex; MFG: middle frontal gyrus

Figure 1 ReHo in three different frequency bands

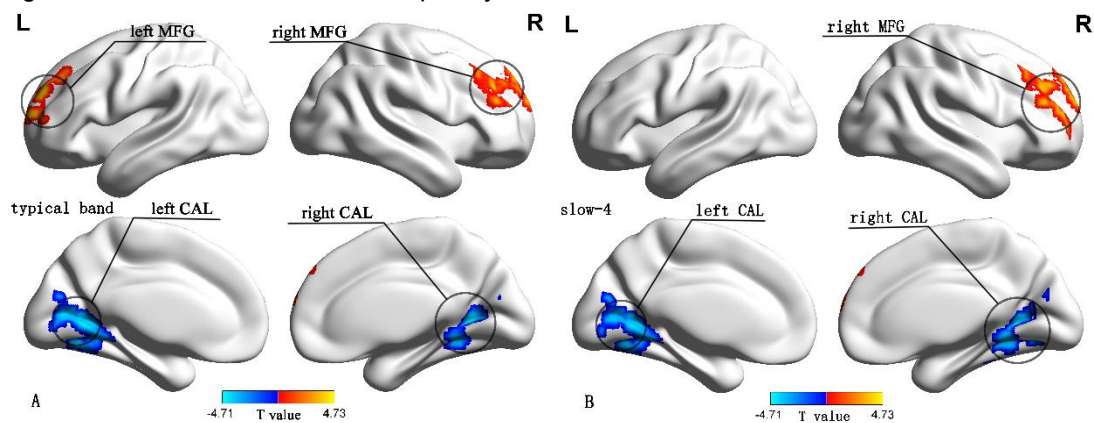

T-statistic ReHo maps of non-NPSLE patients versus healthy controls (HCs) in slow-5 (voxel  $p < 0.005$ , cluster  $p < 0.05$ , GRF corrected). Two-sample t-test showed abnormal ReHo in bilateral middle frontal gyrus and bilateral calcarine fissure and surrounding cortex in typical band and slow-4. Hot colors indicate increased ReHo in patients compared with HCs; Cold colors indicate decreased ReHo in patients compared with HCs.

Table 2: The difference in fALFF value in brain regions between SLE and HC

| Brain regions              | Cluster size<br>( Number of voxels ) | Peak MNI coordinates |     |     | Peak<br>intensity |
|----------------------------|--------------------------------------|----------------------|-----|-----|-------------------|
|                            |                                      | X                    | Y   | Z   |                   |
| Typical band (0.01–0.08Hz) |                                      |                      |     |     |                   |
| Right CAU                  | 222                                  | 9                    | 24  | -6  | 4.57              |
| Right MFG                  | 214                                  | 48                   | 6   | 54  | 4.76              |
| Slow-4 (0.027-0.073Hz)     |                                      |                      |     |     |                   |
| Right CAL                  | 164                                  | 30                   | -57 | 3   | -4.19             |
| Right MFG                  | 169                                  | 36                   | 42  | 33  | 4.07              |
| Slow-5 (0.01–0.027Hz)      |                                      |                      |     |     |                   |
| Right ORBinf               | 238                                  | 27                   | 24  | -18 | 4.52              |
| Right MFG                  | 203                                  | 48                   | 42  | 21  | 4.72              |

MNI, Montreal Neurological Institute; CAU: caudate nucleus; CAL: calcarine fissure and surrounding cortex; MFG: middle frontal gyrus; ORBinf: inferior frontal gyrus, orbital part

Figure 2 fALFF in three different frequency bands

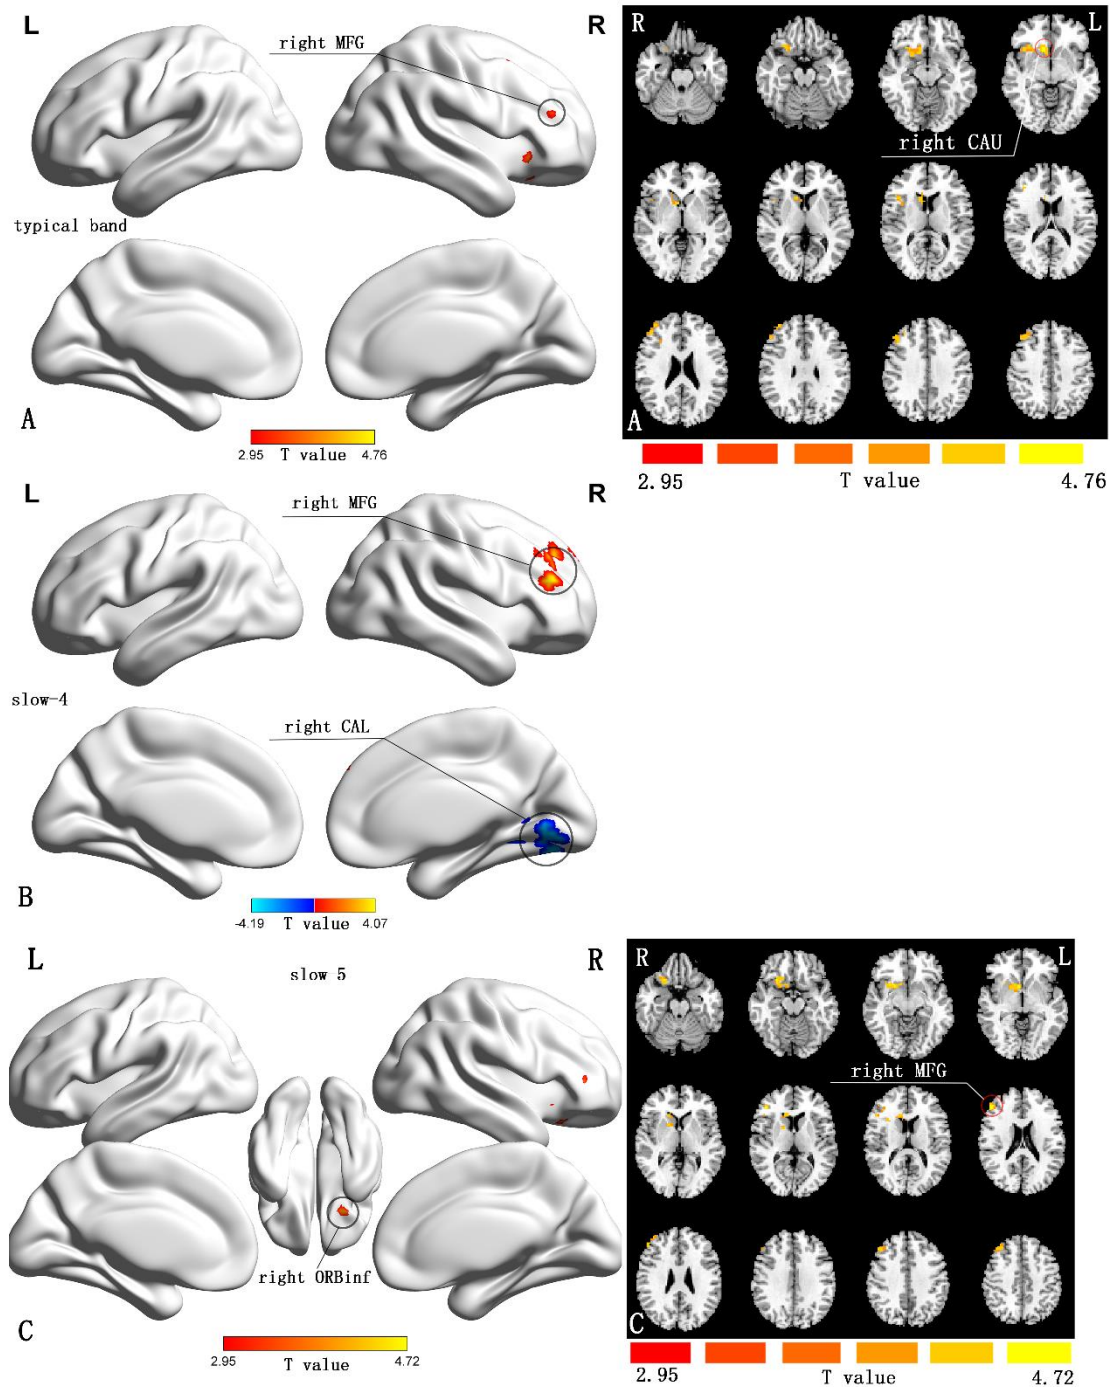

T-statistic fALFF maps of non-NPSLE patients versus healthy controls (HCs) in slow-5 (voxel  $p < 0.005$ , cluster  $p < 0.05$ , GRF corrected). Two-example t-test showed abnormal fALFF in right middle frontal gyrus, right caudate nucleus, right calcarine fissure and surrounding cortex and right inferior frontal gyrus, orbital part in three different frequency bands. Hot colors indicate increased fALFF in patients compared with HCs; Cold colors indicate decreased fALFF in patients compared with HCs.

Figure 3. correlation analysis

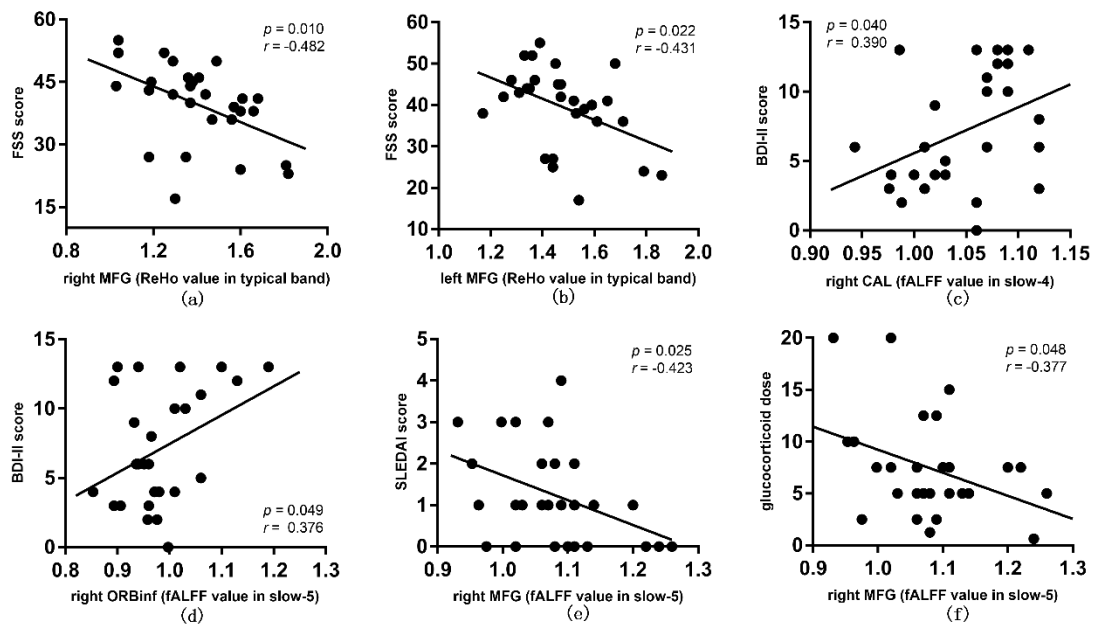

The correlation analysis revealed significantly negative correlations between the fatigue severity scale and ReHo values in bilateral MFG in typical band. The Beck Depression Inventory II showed significantly positive correlations with fALFF values in right CAL in slow-4 and right ORBinf in slow-5. Significantly negative correlation was found between SLEDAI score and fALFF values in right MFG in slow-5. Moreover, the glucocorticoid dose was negatively correlated with fALFF values in right MFG in slow-5.

Table 3: The difference in dReHo value in brain regions between SLE and HC (length of window size: 75 TR; step of window size: 20 TR)

| Brain regions              | Cluster size<br>( Number of voxels ) | Peak MNI coordinates |     |     | Peak<br>intensity |
|----------------------------|--------------------------------------|----------------------|-----|-----|-------------------|
|                            |                                      | X                    | Y   | Z   |                   |
| Typical band (0.01–0.08Hz) |                                      |                      |     |     |                   |
| Left SFG                   | 504                                  | -21                  | 39  | 45  | -4.77             |
| Left PCL                   | 775                                  | -9                   | -33 | 63  | -4.47             |
| Right PreCG                | 230                                  | 27                   | -18 | 66  | -4.62             |
| Slow-4 (0.027-0.073Hz)     |                                      |                      |     |     |                   |
| Right PreCG                | 479                                  | 27                   | -18 | 69  | -4.73             |
| Left SOG                   | 303                                  | -18                  | -87 | 36  | -4.46             |
| Left SFG                   | 462                                  | -27                  | 39  | 48  | -4.98             |
| Left PreCG                 | 515                                  | -39                  | -24 | 66  | -4.18             |
| Slow-5 (0.01–0.027Hz)      |                                      |                      |     |     |                   |
| Right ITG                  | 135                                  | 51                   | -24 | -21 | -4.27             |
| Left MOG                   | 238                                  | -33                  | -81 | 15  | -4.31             |
| Left SFG                   | 521                                  | -24                  | 42  | 48  | -4.55             |

MNI, Montreal Neurological Institute; SFG: superior frontal gyrus; PCL: paracentral lobule; PreCG: precentral gyrus; SOG: superior occipital gyrus; ITG: inferior temporal gyrus

Figure 4 dReHo in three different frequency bands

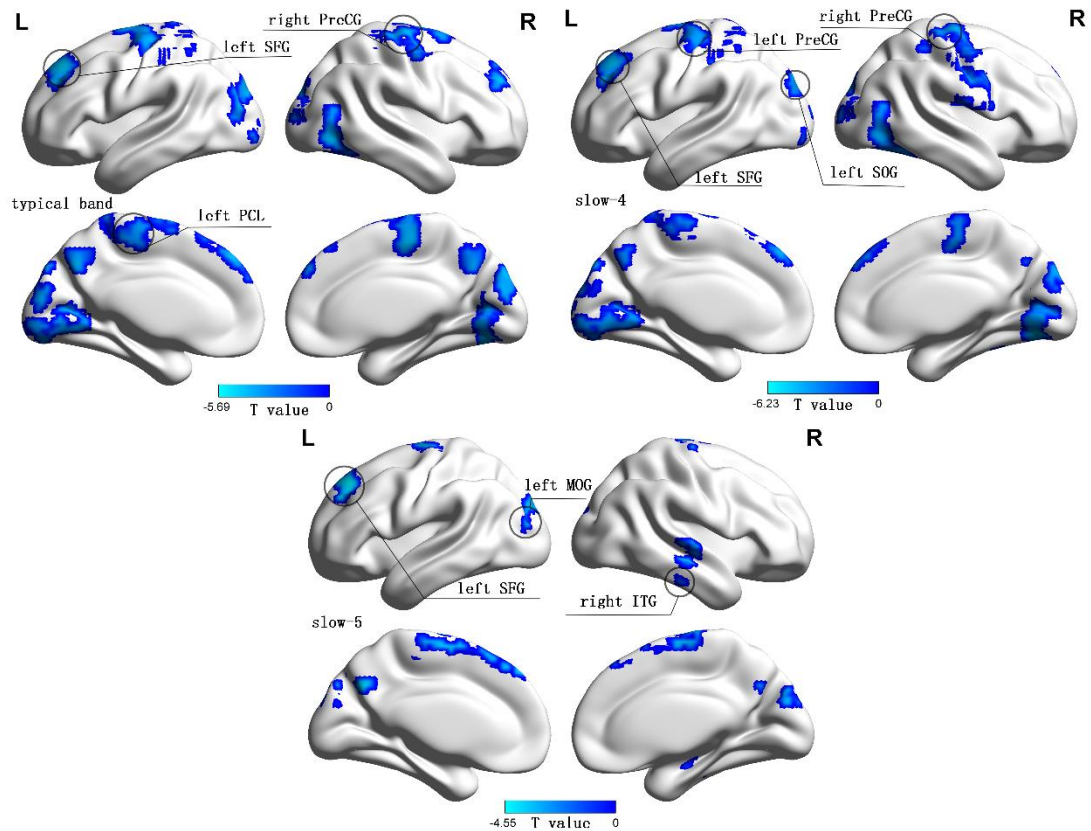

T-statistic dReHo maps of non-NPSLE patients versus healthy controls (HCs) (voxel  $p < 0.005$ , cluster  $p < 0.05$ , GRF corrected). A: dReHo map of non-NPSLE patients versus healthy controls in typical band; B: dReHo map of non-NPSLE patients versus healthy controls in slow-4. C: dReHo map of non-NPSLE patients versus healthy controls in slow-4. Hot colors indicate increased dReHo in patients compared with HCs; Cold colors indicate decreased dReHo in patients compared with HCs. R: right hemisphere; L: left hemisphere; SFG: superior frontal gyrus; PCL: paracentral lobule; PreCG: precentral gyrus; SOG: superior occipital gyrus; ITG: inferior temporal gyrus

Table 4: The difference in dfALFF value in brain regions between SLE and HC (length of window size: 75 TR; step of window size: 20 TR)

| Brain regions                | Cluster size<br>( Number of voxels ) | Peak MNI coordinates |     |    | Peak intensity |
|------------------------------|--------------------------------------|----------------------|-----|----|----------------|
|                              |                                      | X                    | Y   | Z  |                |
| Typical band (0.01–0.08Hz)   |                                      |                      |     |    |                |
| Right SMG                    | 122                                  | 54                   | -42 | 39 | -4.63          |
| Left SFG                     | 151                                  | -15                  | 30  | 60 | -4.93          |
| Left PoCG                    | 98                                   | -33                  | -36 | 72 | -3.88          |
| Slow-4 (0.027-0.073Hz)       |                                      |                      |     |    |                |
| No significant brain regions |                                      |                      |     |    |                |
| Slow-5 (0.01–0.027Hz)        |                                      |                      |     |    |                |
| No significant brain regions |                                      |                      |     |    |                |

MNI, Montreal Neurological Institute; SFG: superior frontal gyrus; SMG: supramarginal gyrus; PoCG: postcentral gyrus

Figure 5 dfALFF in three different frequency bands

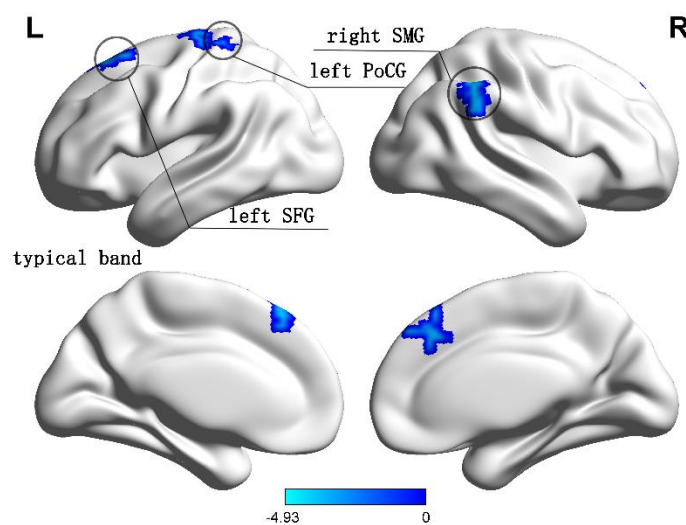

T-statistic dfALFF maps of non-NPSLE patients versus healthy controls (HCs) typical band (voxel  $p < 0.005$ , cluster  $p < 0.05$ , GRF corrected). Hot colors indicate increased dfALFF in patients compared with HCs; Cold colors indicate decreased dfALFF in patients compared with HCs. R: right hemisphere; L: left hemisphere; SFG: superior frontal gyrus; SMG: supramarginal gyrus; PoCG: postcentral gyrus
